# Supplementary material
Source: PubMed Central journal article supplement (PMC2600583)
Supplement: NIHMS67896-supplement-01.pdf [file NIHMS67896-supplement-01.pdf]

## Supplemental Data

### E2A Proteins Promote Development

#### of Lymphoid-Primed Multipotent Progenitors

Sheila Dias, Robert Månsson, Sandeep Gurbuxani, Mikael Sigvardsson, and Barbara L. Kee

Figure S1 Dias et al.

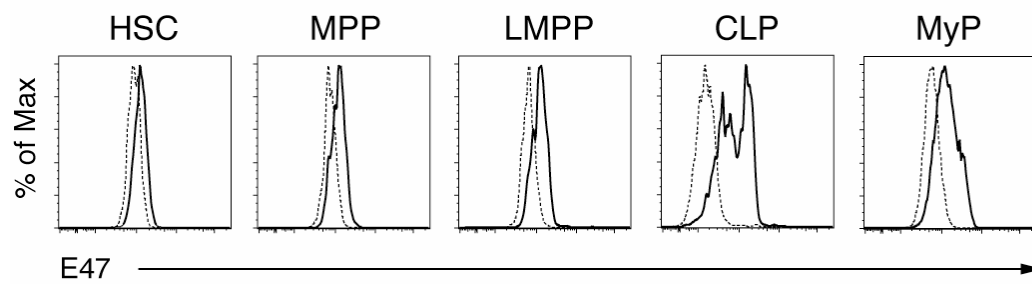

#### Figure S1. E2A protein in multipotent progenitors

Intracellular staining for the E2A protein E47 in WT HSCs (LSK Flt3<sup>-</sup>), MPPs (LSK Flt3<sup>lo</sup>), LMPPs (LSK Flt3<sup>hi</sup>), CLPs (LSK<sup>lo</sup>IL-7R $\alpha$ <sup>+</sup>Flt3<sup>+</sup>), and myeloid progenitors (MyP, LSK expressing Fc $\gamma$ RII/III), as indicated by the black line. Secondary antibody only control is shown by the dashed line.

Figure S2 Dias et al.

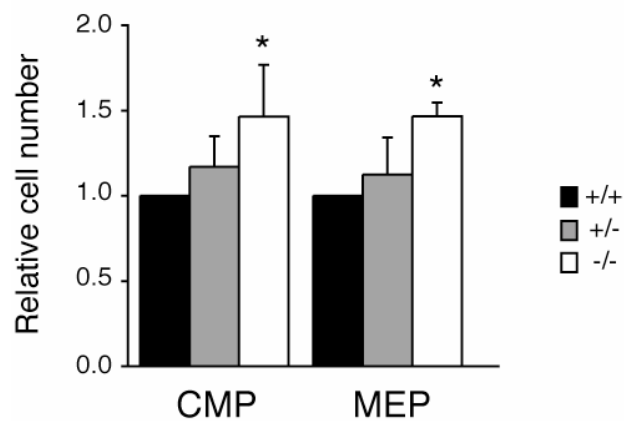

**Figure S2. E2A proteins are dispensable for the generation of CMP and MEP.**

Number of CMPs (LS<sup>+</sup>K<sup>+</sup> FcγRII/III<sup>lo</sup>CD34<sup>+</sup>) and MEPs (LS<sup>+</sup>K<sup>+</sup> FcγRII/III<sup>lo</sup>CD34<sup>-</sup>) in *Tcfe2a*<sup>+/-</sup> (grey) and *Tcfe2a*<sup>-/-</sup> (white) mice relative to WT (black; set to 1). A minimum of 6 mice were analyzed in each group; bars represent the mean ± SD; \* *p* < 0.05.

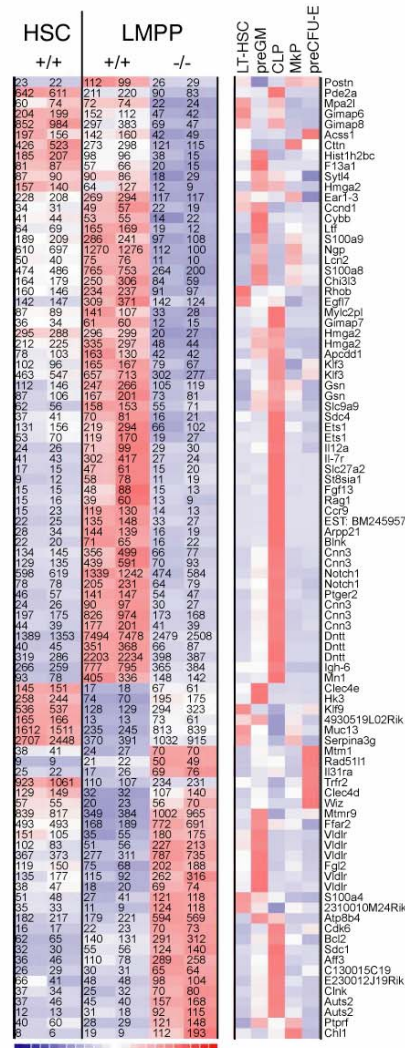

**Figure S3. Comparative analysis of the *Tcfe2a*<sup>+/+</sup> and *Tcfe2a*<sup>-/-</sup> LMPP transcriptome**

Clusters show genes that are differentially expressed in replicate samples (one per column) of *Tcfe2a*<sup>+/+</sup> and *Tcfe2a*<sup>-/-</sup> LMPPs and expression of these genes in *Tcfe2a*<sup>+/+</sup> HSCs is shown for comparison. The clustering includes all genes with expression levels >50 in at least one of the four LMPP arrays and differing by 50% (using a lower 90% confidence bound of fold change). Each row corresponds to one unique identifier and numbers are the raw expression values. The right-most clustering shows the lineage

association of these differentially expressed genes in LT-HSC, preGM, CLP, MkP and preCFU-E (as defined in (Pronk et al., 2007b)). Red indicates high, blue low, and white intermediate expression levels.

Figure S4 Dias et al.

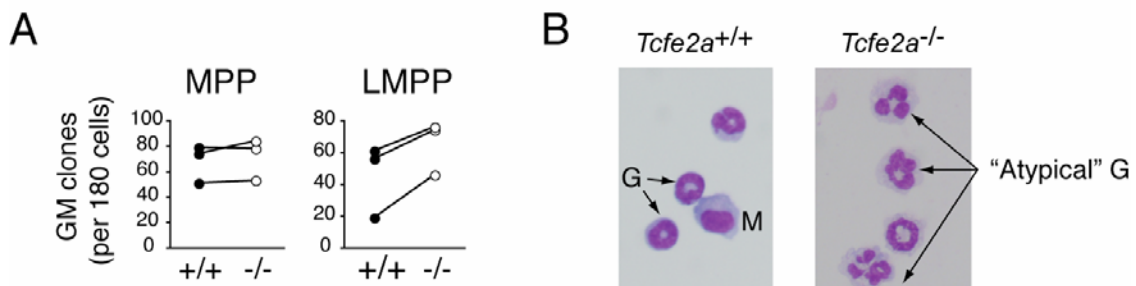

**Figure S4. *Tcfe2a*<sup>-/-</sup> LMPPs have a higher GM clonogenic potential than *Tcfe2a*<sup>+/+</sup> LMPPs.**

(A) Total number of GM colonies generated per 180 single MPPs or LMPP plated from mice of the indicated *Tcfe2a* genotype. Data from 3 independent experiments is shown.

(B) Wright-Giemsa staining of a GM *Tcfe2a*<sup>+/+</sup> (left) and *Tcfe2a*<sup>-/-</sup> (right) clone. G = granulocyte; M = macrophage. *Tcfe2a*<sup>-/-</sup> derived G frequently have an atypical morphology consistent with apoptosis.

**Table S1. Surface markers for the progenitor populations studied.**

|             | <u>Population</u> | <u>Markers</u>                                                                              | <u>Lineage</u>                                                                                                                                                       |
|-------------|-------------------|---------------------------------------------------------------------------------------------|----------------------------------------------------------------------------------------------------------------------------------------------------------------------|
| Thymus      | ETP               | <b>Lin<sup>-</sup>c-kit<sup>high</sup>CD25<sup>-</sup></b>                                  | <b>CD3<math>\epsilon</math>, CD8<math>\alpha</math>, TCR<math>\beta</math>, TCR<math>\gamma\delta</math>,<br/>NK1.1, CD11c, Ter119,<br/>CD11b, Ly-6G, B220, CD19</b> |
|             | DN2               | <b>Lin<sup>-</sup>c-kit<sup>high</sup>CD25<sup>+</sup></b>                                  |                                                                                                                                                                      |
|             | DN3               | <b>Lin<sup>-</sup>c-kit<sup>+</sup>CD25<sup>+</sup></b>                                     |                                                                                                                                                                      |
| Bone Marrow | HSC               | <b>LSK Flt3<sup>-</sup></b>                                                                 | <b>CD3<math>\epsilon</math>, CD4, CD8<math>\alpha</math>, NK1.1,<br/>Ter119, CD11b, Ly-6G, B220</b>                                                                  |
|             | MPP               | <b>LSK Flt3<sup>low</sup></b>                                                               |                                                                                                                                                                      |
|             | LMPP              | <b>LSK Flt3<sup>high</sup></b>                                                              |                                                                                                                                                                      |
|             | CLP               | <b>LS<sup>low</sup>K<sup>low</sup> IL-7R<math>\alpha</math><sup>+</sup>Flt3<sup>+</sup></b> |                                                                                                                                                                      |
|             | CMP               | <b>LS<sup>-</sup>K Fc<math>\gamma</math>RII/III<sup>low</sup>CD34<sup>+</sup></b>           | <b>CD3<math>\epsilon</math>, CD4, CD8<math>\alpha</math>, NK1.1,<br/>Ter119, Ly-6G, B220, CD19,<br/>IgM, IL-7R<math>\alpha</math></b>                                |
|             | MEP               | <b>LS<sup>-</sup>K Fc<math>\gamma</math>RII/III<sup>low</sup>CD34<sup>-</sup></b>           |                                                                                                                                                                      |
| Fetal Liver | MPP               | <b>Lin<sup>-</sup>c-kit<sup>high</sup>CD27<sup>+</sup></b>                                  | <b>Ter119, Ly-6G</b>                                                                                                                                                 |

Antibody clones: CD3 $\epsilon$ , CD4 (GK1.5), CD8 $\alpha$  (53-6.7), TCR $\beta$  (H57-597), TCR $\gamma\delta$  (UC7-13D5), NK1.1 (PK136), CD11c (HL3), Ter-119, Fc $\gamma$ III/IIR (2.4G2), CD11b (M1/70), Ly-6G (RB6-8C5), B220 (RA3-6B2), CD19 (1D3), IgM (R6-60.2), IL-7R $\alpha$  (A7R34), CD25 (PC61.5), CD27 (LG. 3A10), *c-kit* (2B8), Sca-1 (D7), Flt3 (A2F10), CD34 (RAM34).

Table S2. QPCR primers.

| <b><u>mGene</u></b>  | <b><u>Sequence</u></b>                                          |
|----------------------|-----------------------------------------------------------------|
| <b><i>Hprt</i></b>   | For 5' ACCTCTCGAAGTGTGATA<br>Rev 5' CAACAACAACTTGTCTGGA         |
| <b><i>Ikzf1</i></b>  | For 5' CAATGTCGCCAAACGTAAGA<br>Rev 5' GTTGATGGCATTGTTGATGG      |
| <b><i>Sfpi1</i></b>  | For 5' GCTTCCCTTATCAAACCTTGTCCT<br>Rev 5' GGCGAATCTTTTTCTTGCTGC |
| <b><i>Gfi1</i></b>   | For 5' TCCGAGGGTCCAAACATCG<br>Rev 5' TTGAAAGGCAGCGTGTAGGG       |
| <b><i>Notch1</i></b> | For 5' GCATTGATGATGTCGCTGGATAC<br>Rev 5' GCATACCCCGCTGTTTTT     |
| <b><i>Ccr9</i></b>   | For 5' CAATCTGGGATGAGCCTAAACAAC<br>Rev 5' ACCAAAAACCAACTGCTGCG  |
